# Supplementary material for: Highly crystallized glass-ceramics from high content gold tailings via a one-step direct cooling method
Source: Royal Society of Chemistry journal article supplement (doi:10.1039/d2ra01012g), 2022-01-01
Supplement: d2ra01012g1.pdf [file d2ra01012g1.pdf]

supporting information:

## Highly crystallized glass-ceramics from high content gold

### tailings via one-step direct cooling method

Ke Jiang, Wei Wu, Boyong Ren, Meng Li, Jiaying He, Enze Xu, Junwu Liu, Guoqing Tong, Honghai Zhong\*, Yang Jiang\*

School of Materials Science and Engineering, Hefei University of Technology, Hefei 230009, China.

The previous sample formulation without nucleating agent and the sample XRD patterns.

Table S1: Composition of tailings glass-ceramics (wt.%).

|                                | 1   | 2  | 3  | 4  |
|--------------------------------|-----|----|----|----|
| Gold tailings                  | 80  | 70 | 60 | 50 |
| SiO <sub>2</sub>               | 0   | 7  | 14 | 21 |
| Al <sub>2</sub> O <sub>3</sub> | 0   | 1  | 3  | 4  |
| CaO                            | 15  | 16 | 16 | 18 |
| Li <sub>2</sub> O              | 1.5 | 2  | 3  | 3  |
| MgO                            | 2   | 2  | 2  | 2  |
| ZnO                            | 1.5 | 2  | 2  | 2  |

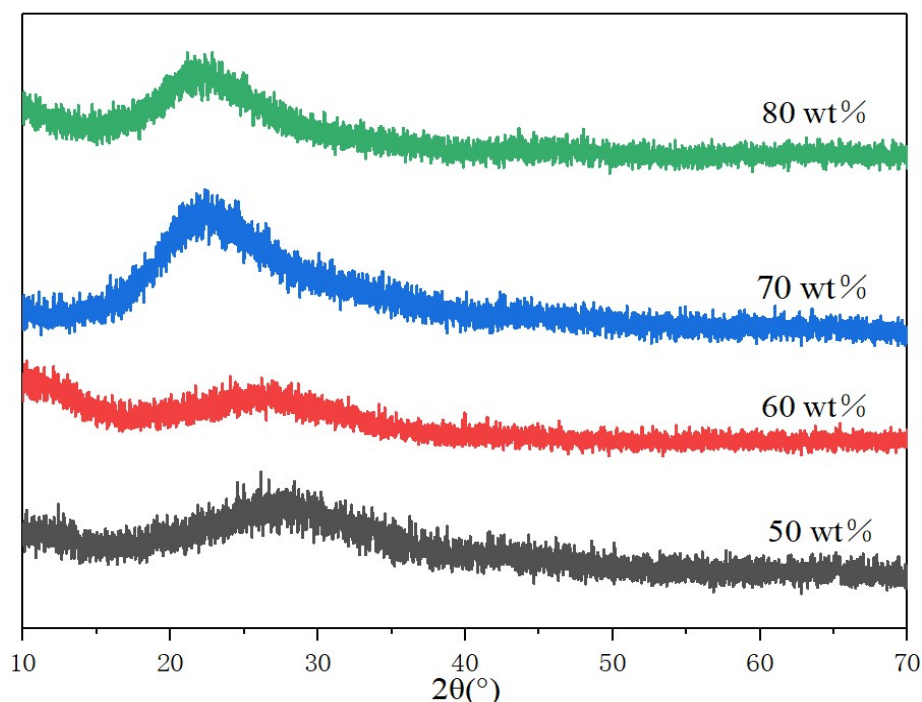

Fig. S1. XRD patterns of samples with different tailings additions at 1000 °C

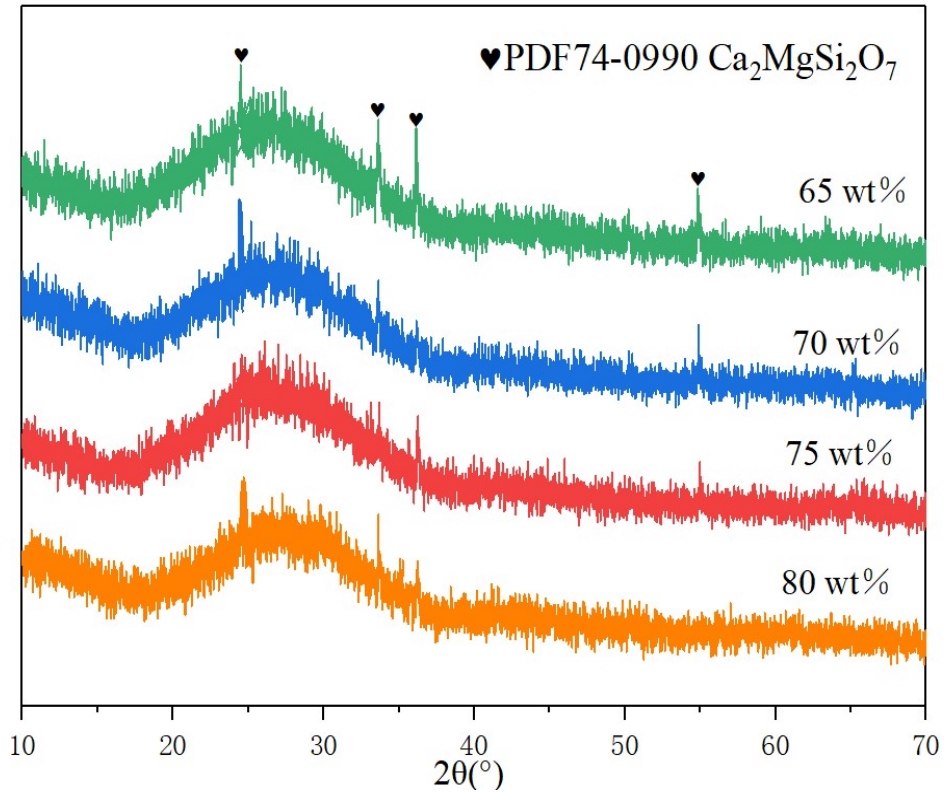

Fig. S2. XRD patterns of glass ceramics crystallized at 1000 °C under different addition

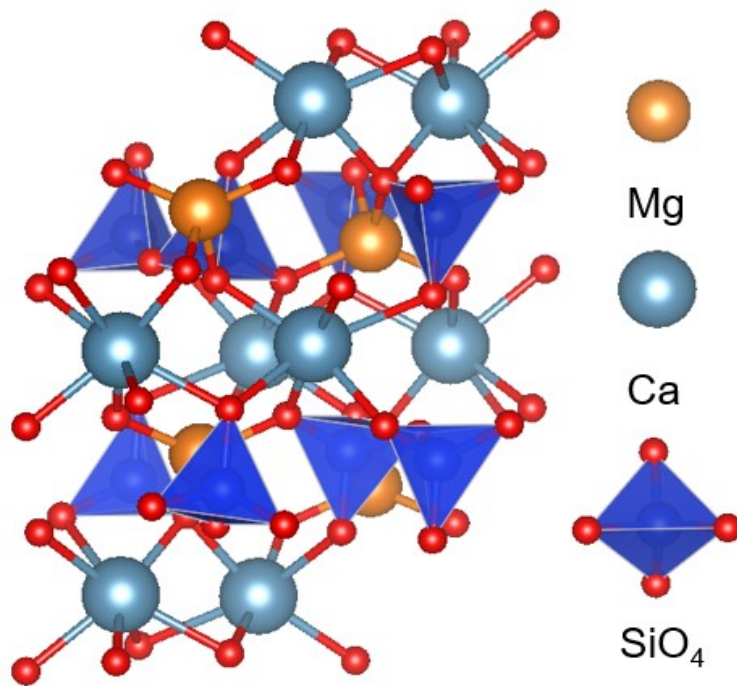

Fig. S3. The crystal structure of Akermanite phase

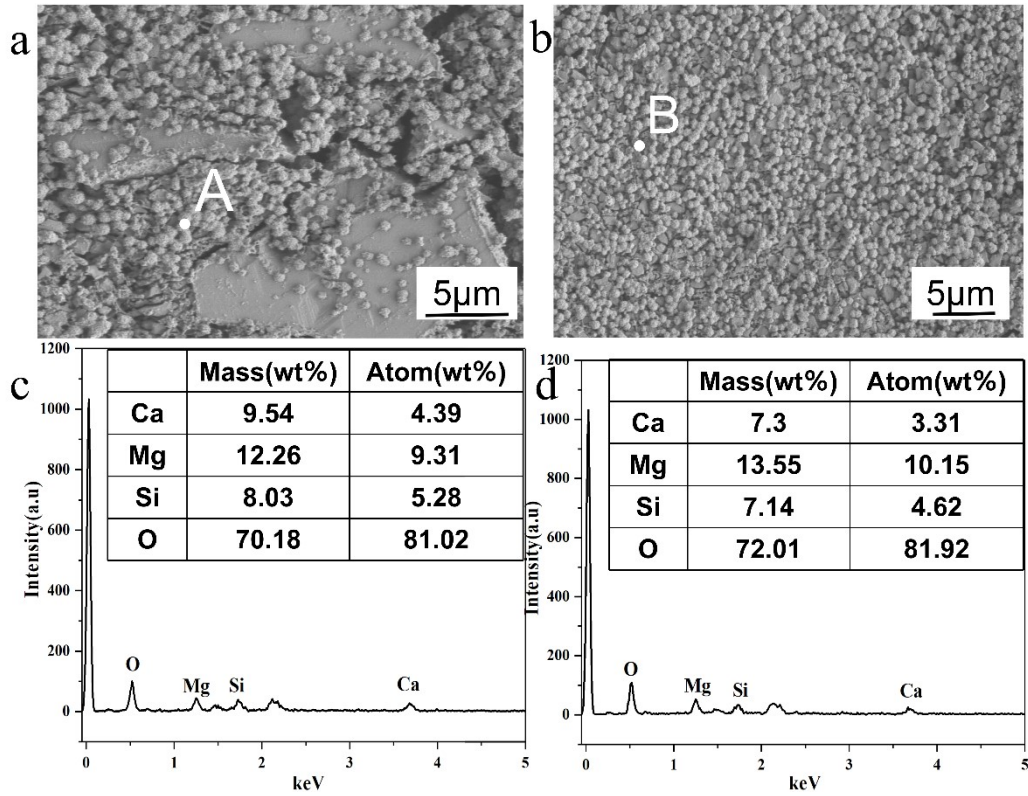

Fig. S4 SEM images of (a) 80 wt% and (b) 60 wt% tailing addition glass-ceramics samples at 950 °C, EDS analysis of (c) A and (b)B.
